# Supplementary material for: Bioinspired and Post-Functionalized 3D-Printed Surfaces with Parahydrophobic Properties
Source: MDPI journal article supplement (doi:10.3390/biomimetics6040071), 2021-12-13
Supplement: s1 [file s1]

# Bioinspired and Post-functionalized 3D-printed surfaces for water harvesting (Supplementary data)

Léna Ciffréo <sup>1</sup>, Claire Marchand <sup>1</sup>, Caroline R. Szczepanski <sup>2</sup>, Marie-Gabrielle Medici <sup>3</sup> and Guilhem Godeau <sup>1,3,\*</sup>

<sup>1</sup> Institut Méditerranéen du Risque de l'Environnement et du Développement Durable (IMREDD), Université Côte d'Azur, 06200 Nice, France

<sup>2</sup> Department of Chemical Engineering & Materials Science, Michigan State University, East Lansing, MI 48824, USA

<sup>3</sup> Institut de Physique de Nice (INPHYNI), Université Côte d'Azur, UMR 7010, 06000 Nice, France;

\* Correspondence: guilhem.godeau@univ-cotedazur.fr; Tel.: +33-489-152-904

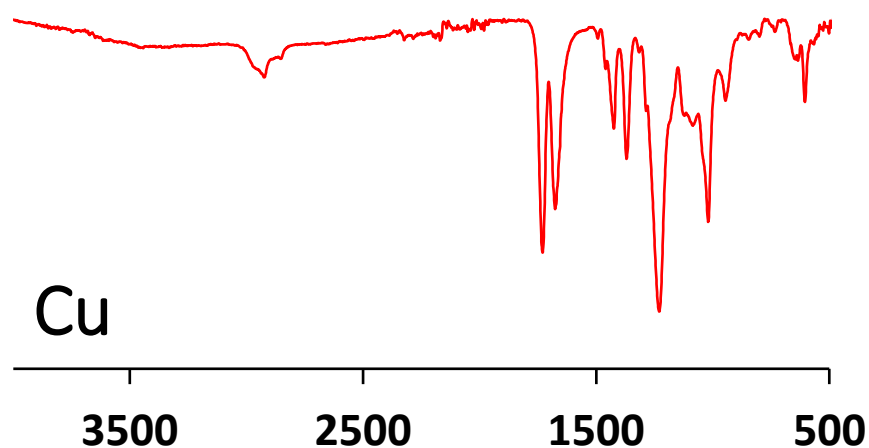

Figure S1. Example of IR for Cu surface.

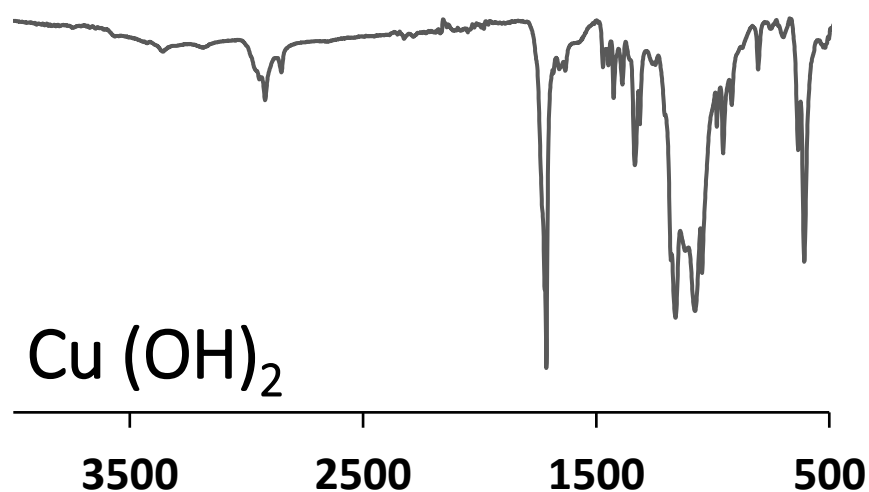

Figure S2. Example of IR for Cu(OH)<sub>2</sub> surface.

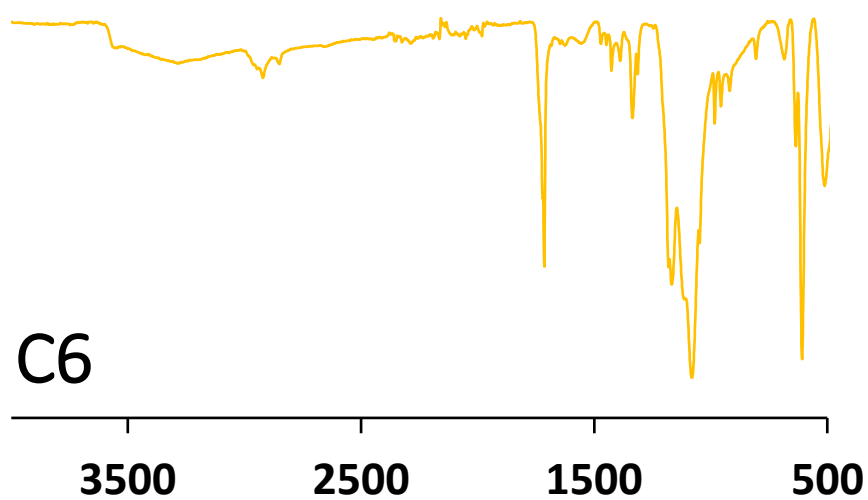

**Figure S3.** Example of IR for C6 surface.

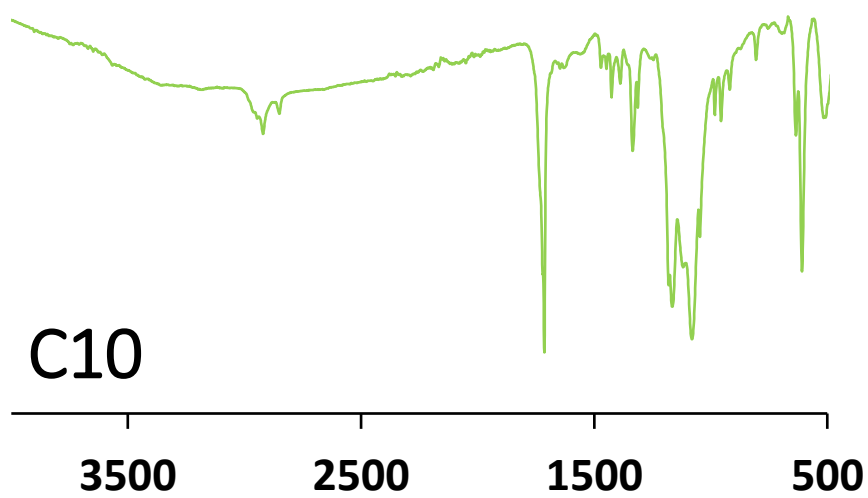

**Figure S4.** Example of IR for C10 surface.

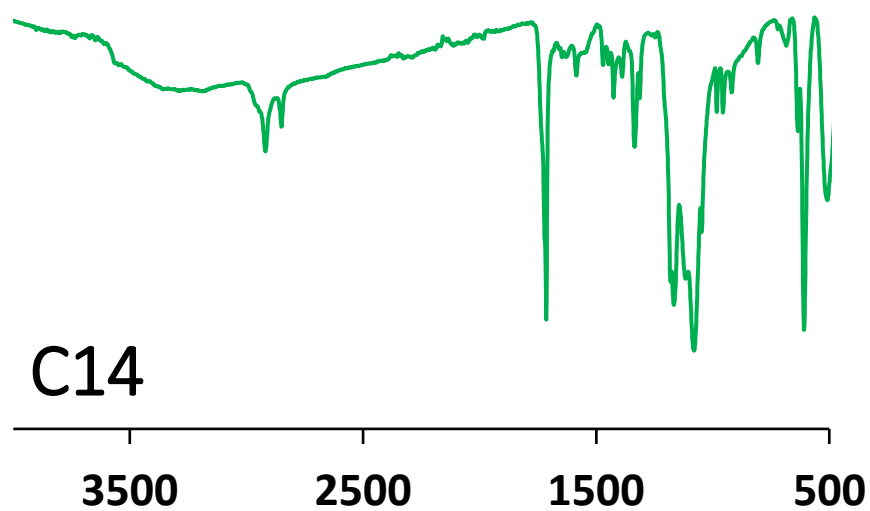

**Figure S5.** Example of IR for C14 surface.

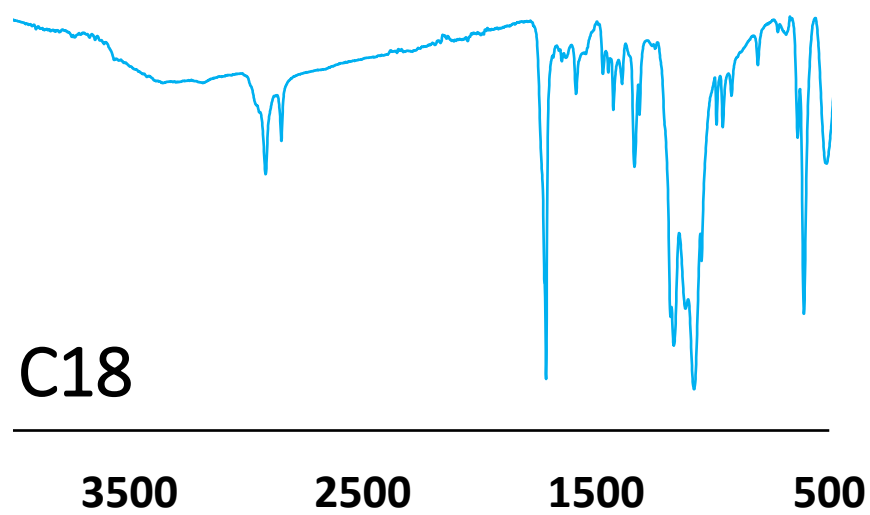

**Figure S6.** Example of IR for C18 surface.

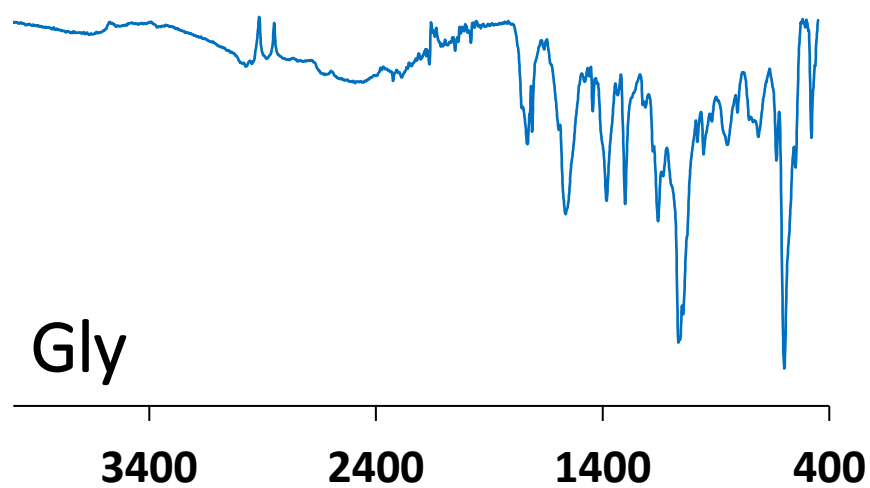

Figure S7. Example of IR for Gly surface.

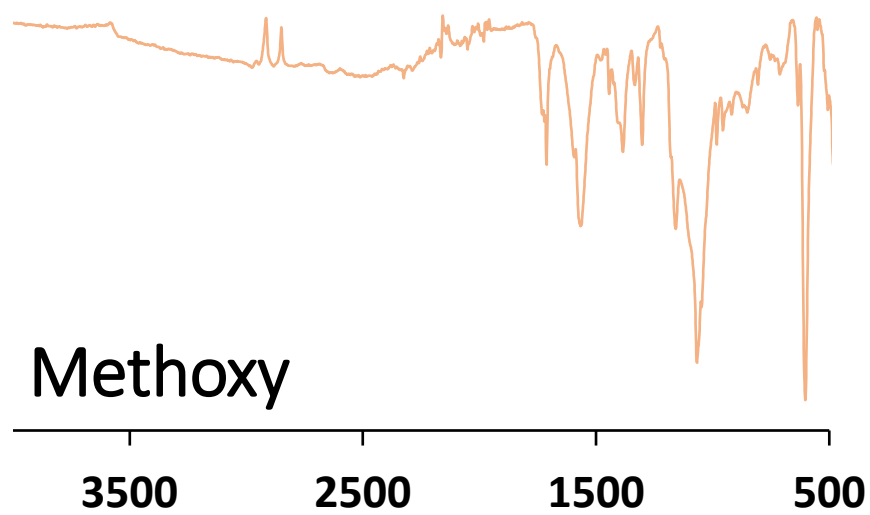

Figure S8. Example of IR for Methoxy surface.

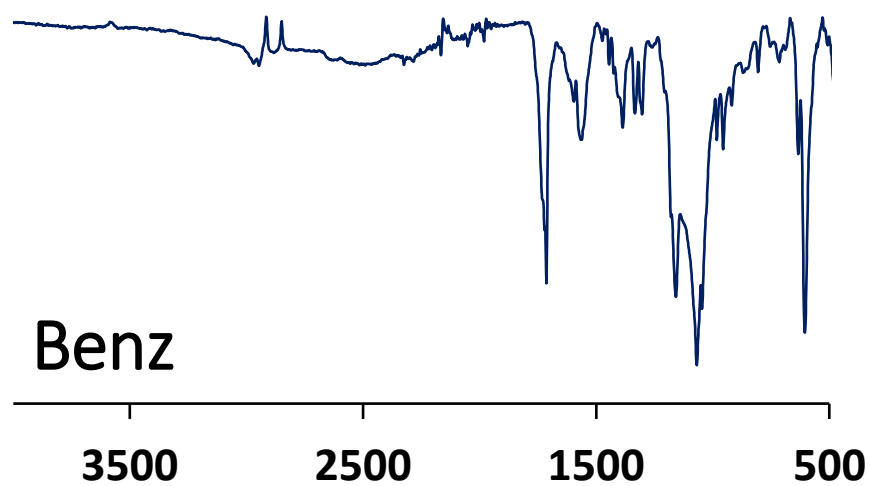

**Figure S9.** Example of IR for Benz surface.

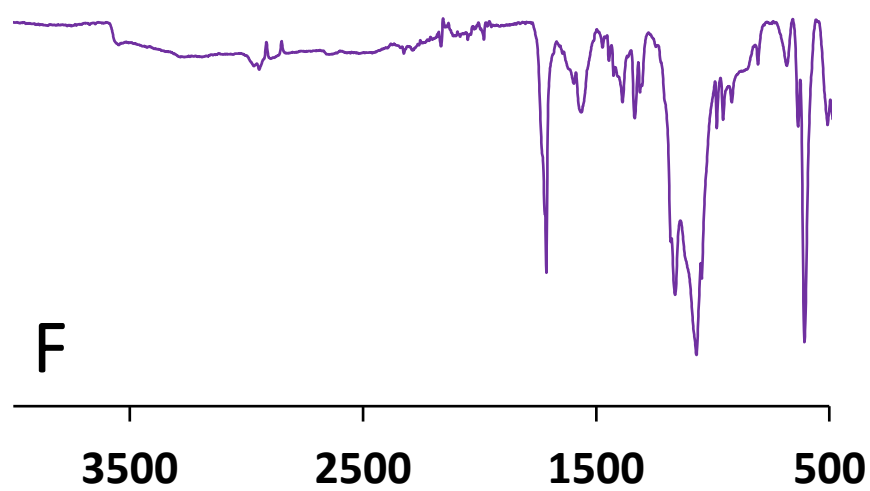

**Figure S10.** Example of IR for F surface.

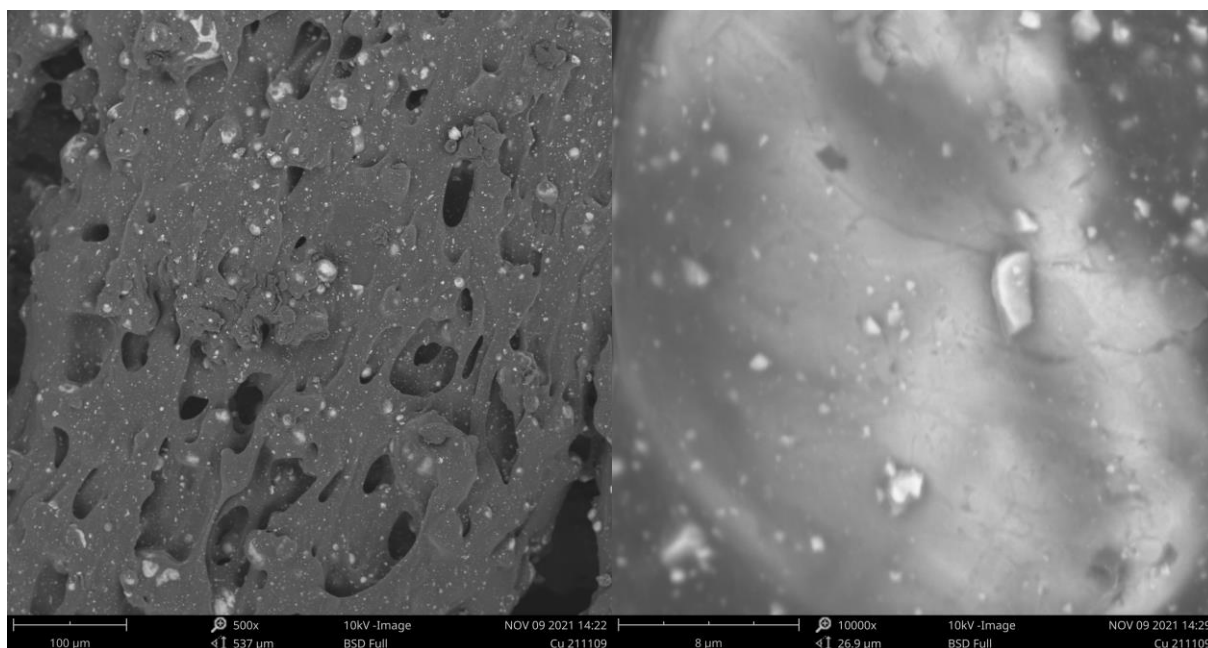

**Figure S11.** Example of SEM images for Cu surface. (Left: low magnification, Right: high magnification)

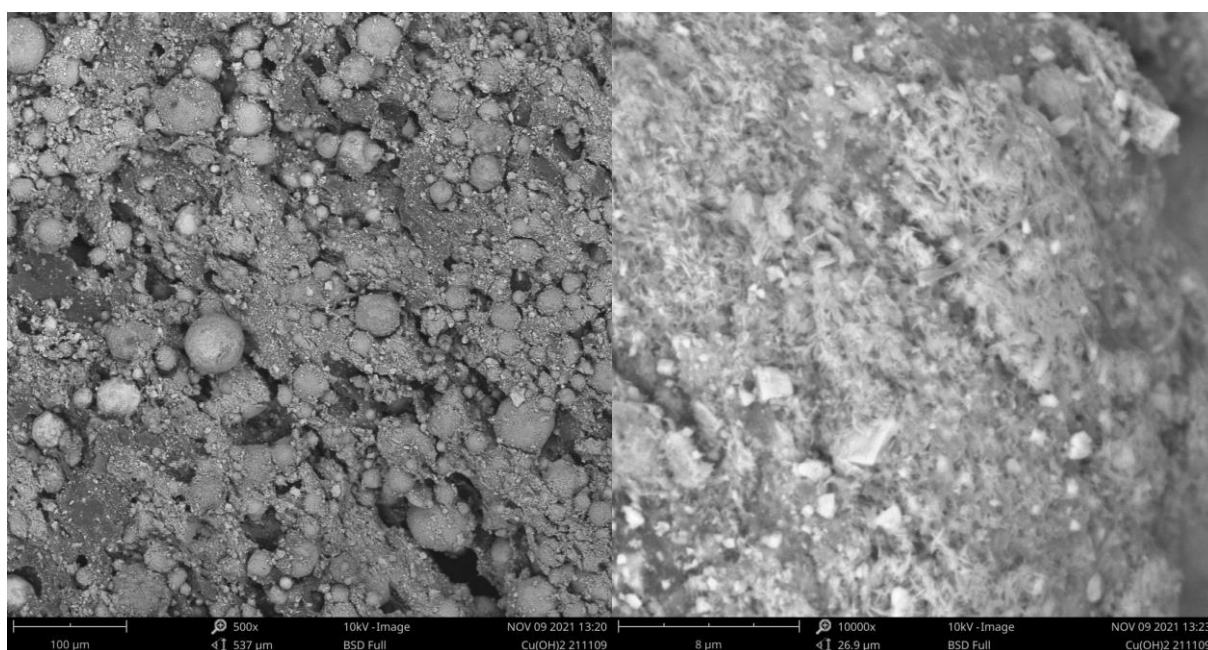

**Figure S12.** Example of SEM images for Cu(OH)<sub>2</sub> surface. (Left: low magnification, Right: high magnification)

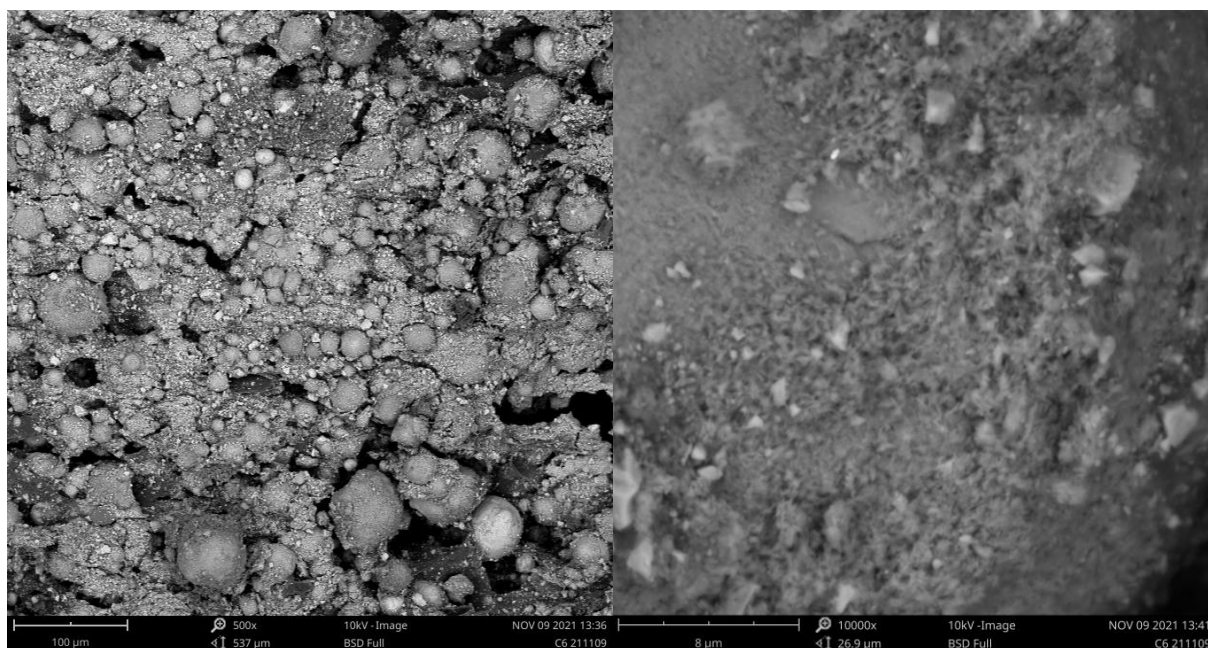

**Figure S13.** Example of SEM images for C6 surface. (Left: low magnification, Right: high magnification)

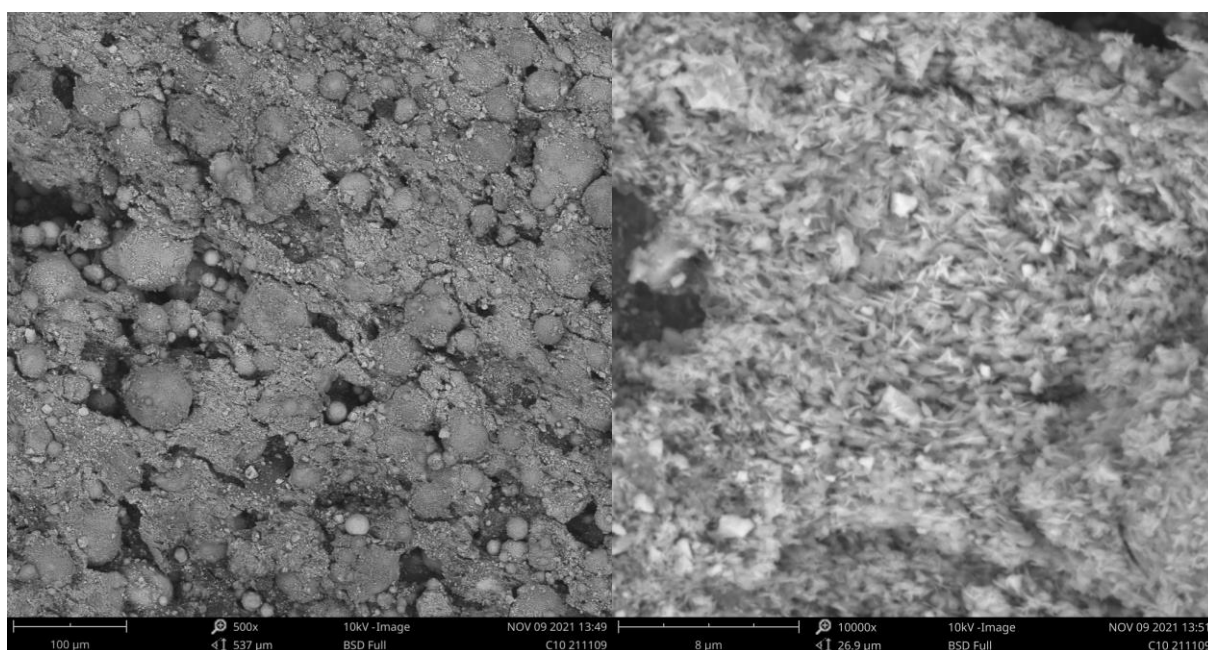

**Figure S14.** Example of SEM images for C10 surface. (Left: low magnification, Right: high magnification)

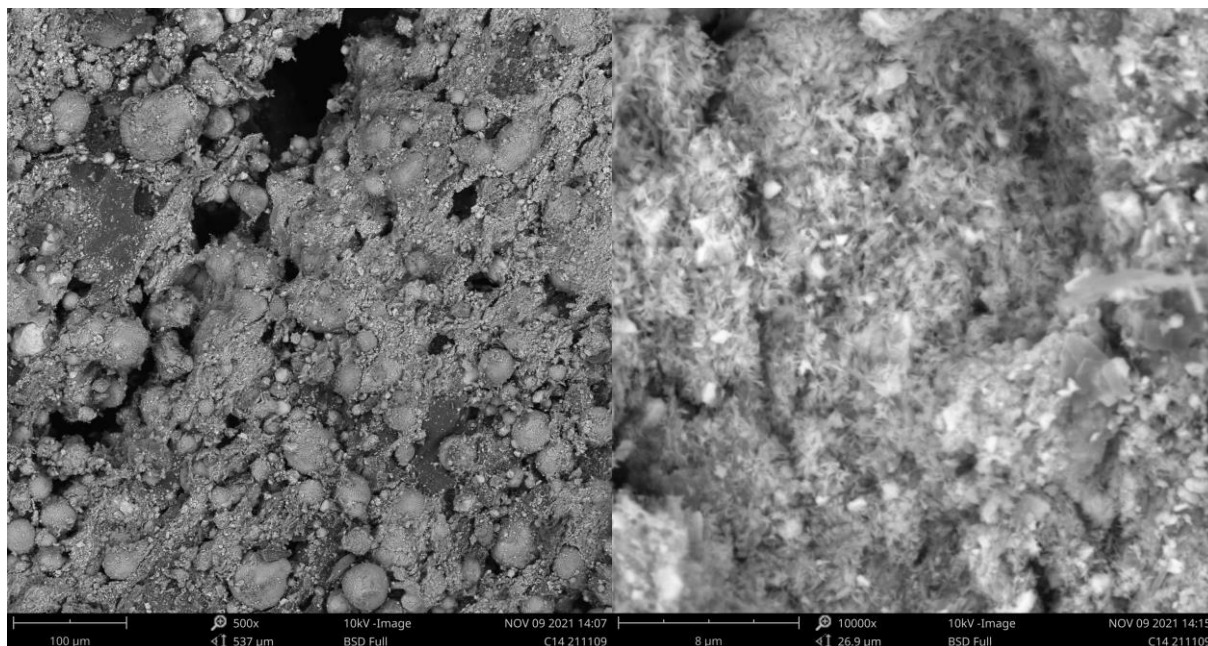

**Figure S15.** Example of SEM images for C14 surface. (Left: low magnification, Right: high magnification)

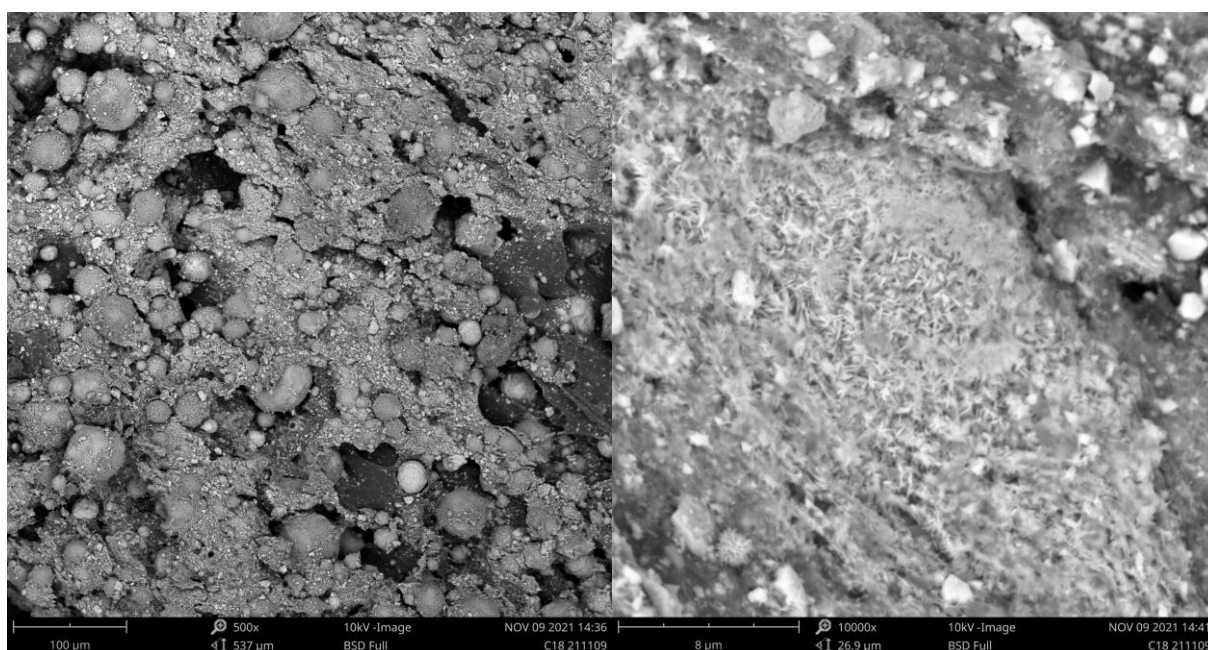

**Figure S16.** Example of SEM images for C18 surface. (Left: low magnification, Right: high magnification)



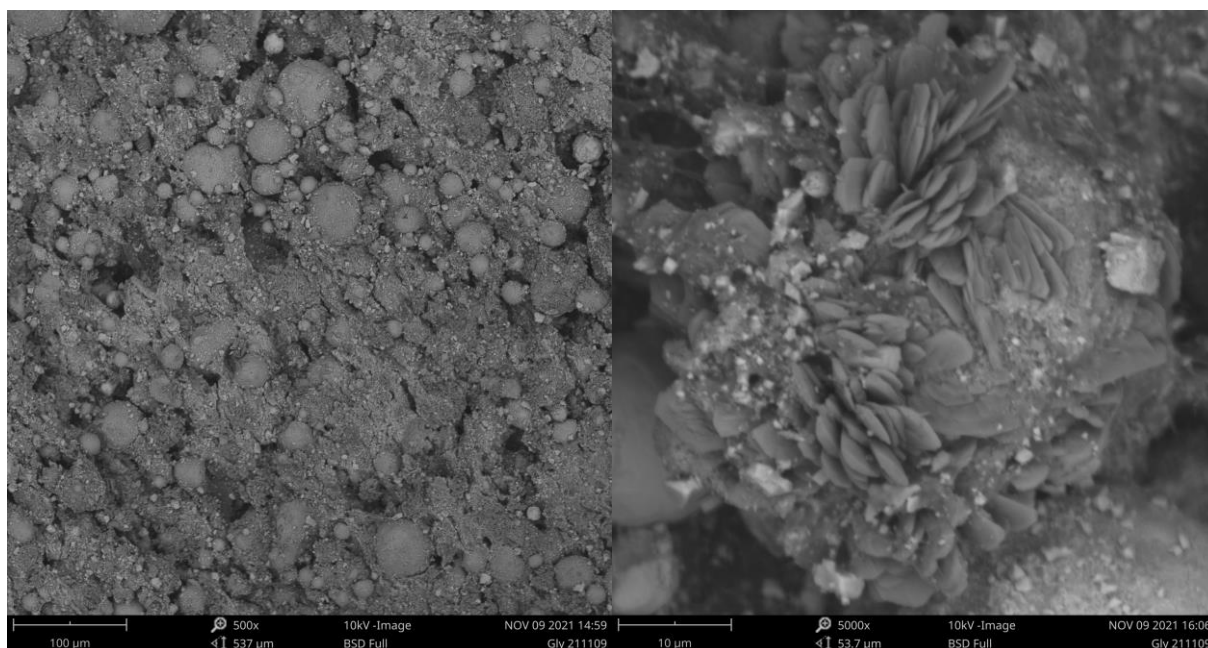

**Figure S17.** Example of SEM images for Gly surface. (Left: low magnification, Right: high magnification)

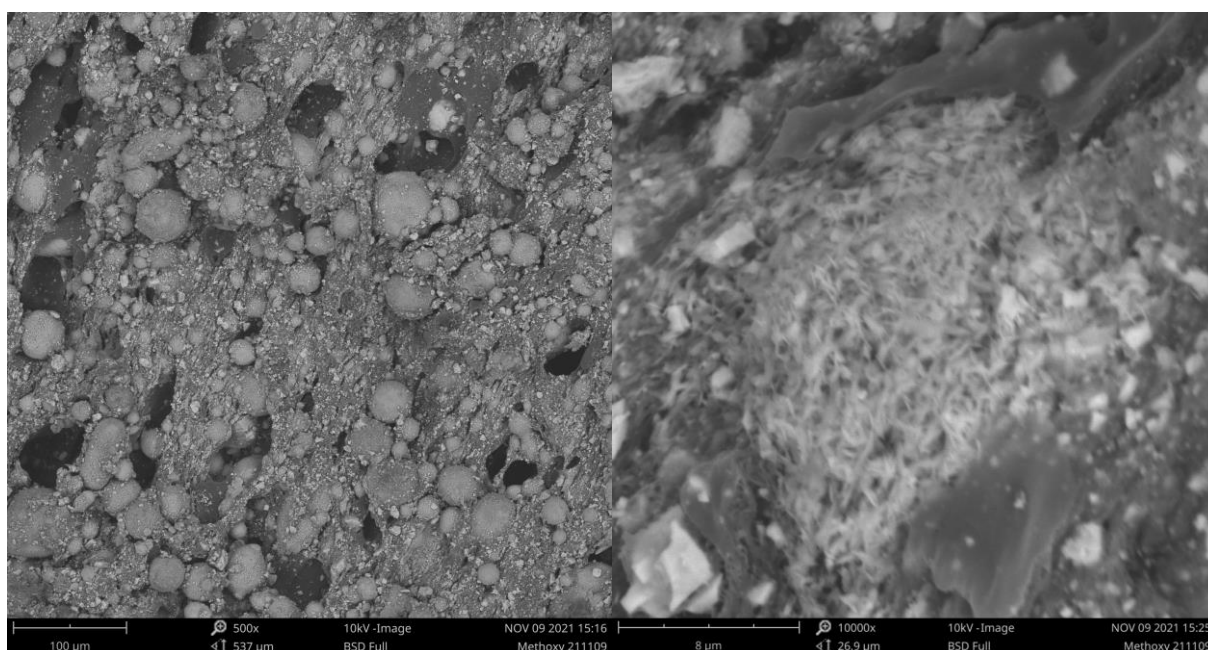

**Figure S18.** Example of SEM images for Methoxy surface. (Left: low magnification, Right: high magnification)

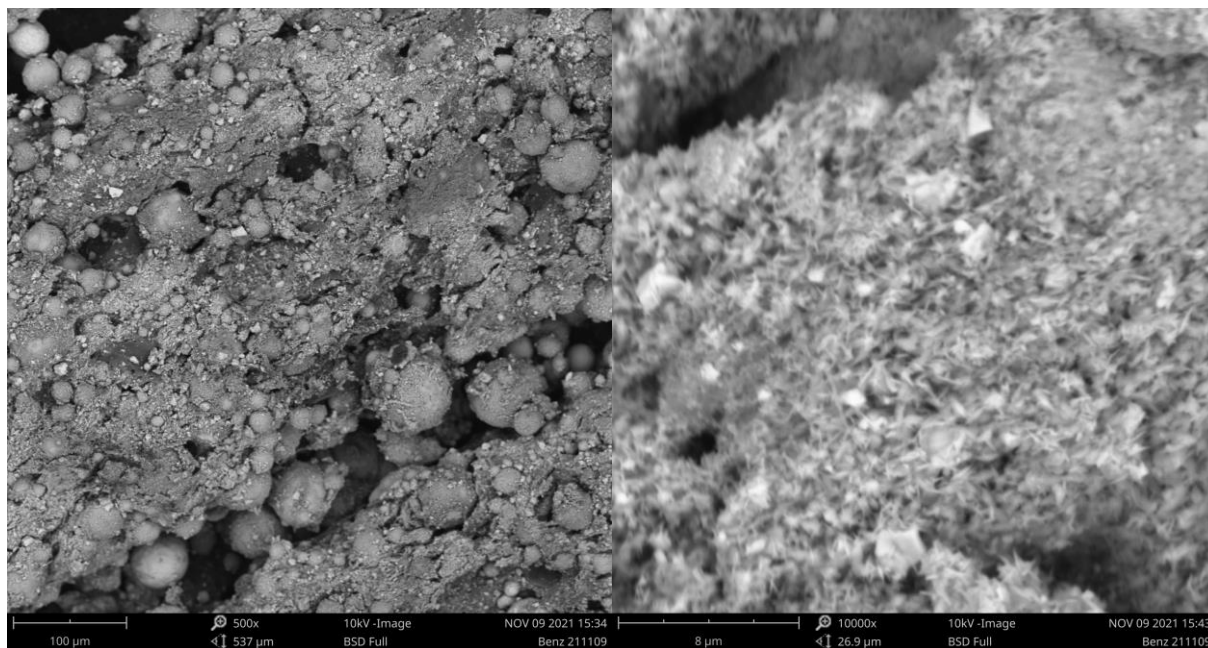

**Figure S19.** Example of SEM images for Benz surface.

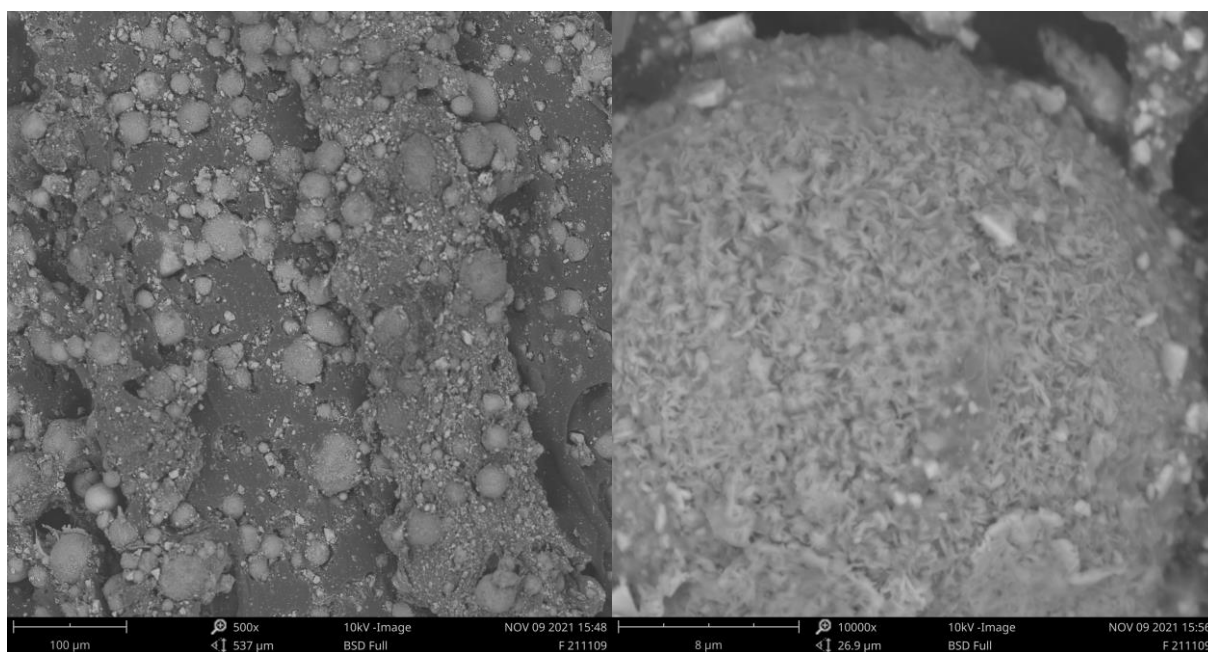

**Figure S20.** Example of SEM images for F surface.
